# Supplementary material
Source: PubMed Central journal article supplement (PMC2917093)

SUPPORTING INFORMATION

**Table 1: Primers for mutants of  $\beta'$  and  $\alpha$**

|                                  | Sequence of the primers (from 5'-3')                  |
|----------------------------------|-------------------------------------------------------|
| Y138F- $\beta'$ (f) <sup>a</sup> | GAATGTTCACTCAGAGATG <b>TT</b> CAGTTTGCTGATAGACAC      |
| Y138- $\beta'$ (r) <sup>b</sup>  | GTGTCTATCAGCAA <b>ACTG</b> AACATCTCTGAGTGAACATTC      |
| C218S- $\alpha$ (f)              | CCGCCACA <b>ACTTTCTAGCTCT</b> TTTTCTTCTGAGTATG        |
| C218S- $\alpha$ (r)              | CATACTCAG AAGAAA <b>AGAG</b> CTAGAAAGTT GTGGGCGG      |
| C218A- $\alpha$ (f)              | CCGCCACA <b>ACTTTCTAGCGCT</b> TTTTCTTCTGAGTATG        |
| C218A- $\alpha$ (r)              | CATACTCAG AAGAAA <b>AGCGCT</b> AGAAAGTT GTGGGCGG      |
| C429S- $\alpha$ (f)              | GCAGCAACCTG <b>TCC</b> ACAGAAATAGTGGAGTACACC          |
| C429S- $\alpha$ (r)              | GGTGTACTCCACTATTTCTGT <b>GGAC</b> AGG TTGCTGC         |
| C429A- $\alpha$ (f)              | CCATCAAATGCAGCAACCTG <b>GCC</b> ACAGAAATAGTGGAG       |
| C429A- $\alpha$ (r)              | CTCCACTATTTCTGT <b>GCC</b> CAGGTTGCTGCATTTGATGG       |
| C444S- $\alpha$ (f)              | GAGGTTGCTGTT <b>TCTA</b> ATTTGGCTTCCCTGGCCC           |
| C444S- $\alpha$ (r)              | GGGCCAGGGAAGCCAAATT <b>AGAA</b> ACAGCAACCTC           |
| C444A- $\alpha$ (f)              | GAGGTTGCTGTT <b>GCTA</b> ATTTGGCTTCCCTGGCCC           |
| C444A- $\alpha$ (r)              | G GGCCAGGGAAGCCAAATT <b>AGCA</b> ACAGCAAC CTC         |
| C787S- $\alpha$ (f)              | GGAGAATAGAGATGAAT <b>TCTCT</b> GATGTGTGGATCCTG        |
| C787S- $\alpha$ (r)              | CAGGATCC ACACATCAG <b>AGATT</b> CATCTC TATTCTCC       |
| C787A- $\alpha$ (f)              | GCTCTTTGGAGAATAGAGATGA <b>AGCTCT</b> GATGTGTGGATCCTG  |
| C787A- $\alpha$ (r)              | CAGGATCC ACACATCAG <b>AGCTT</b> CATCTCTATTCTCCAA AGAG |
| C790S- $\alpha$ (f)              | GGAGAATAGAGATGAATGTCTGATGT <b>TCT</b> GGATCCTG        |
| C790S- $\alpha$ (r)              | CAGGATCC <b>AGAC</b> ATCAGACATTCATCTCTATTCTCC         |
| C790A- $\alpha$ (f)              | GCTCTTTGGAGAATAGAGATGAATGTCTGAT <b>GCT</b> GGATCCTG   |
| C790A- $\alpha$ (r)              | CAGGATCC <b>AGCC</b> ATCAGACATTCATCTC TATTCTCCAAAGAGC |
| E431Q- $\alpha$ (f)              | GCAACCTGTGCACACA <b>AA</b> ATAGTGGAGTACACC            |
| E431Q- $\alpha$ (r)              | GGTGTACTCCACTAT <b>TTGT</b> GTGCACAGG TTGC            |
| E431D- $\alpha$ (f)              | GCAACCTGTGCACAG <b>AC</b> ATAGTGGAGTACACC             |
| E431D- $\alpha$ (r)              | GGTGTACT CCACTAT <b>GTCT</b> GTGCACAGG TTGC           |

The mutation sites are highlighted.

<sup>a</sup> forward primer (f).

<sup>b</sup> reverse primer (r).

Figure S1. Analysis by HPLC of products generated during inactivation of  $\alpha_n(\beta'2)_m$  by  $[5-^3\text{H}]\text{-F}_2\text{CDP}$ . The inactivation mixture contained final concentrations of  $\alpha$ ,  $\beta'$ , 1.2  $\mu\text{M}$ ;  $[5-^3\text{H}]\text{-F}_2\text{CDP}$ , 1.2  $\mu\text{M}$ , 3mM ATP, 5mM DTT. Subsequent to removal of the protein from the small molecules by YM3 centricon and removal of the phosphates with alkaline phosphatase, the filtrate was injected into an Altech Adsorbosphere Nucleotide Nucleoside C-18 column at a flow rate of 1mL/min. The elution buffer contained: Buffer A, 10 mM  $\text{NH}_4\text{OAc}$ , pH 6.8; Buffer B: 100% methanol. A 10 min isocratic elution was followed by a linear gradient to 40% B over 30 min. The elution profile monitored by  $A_{267\text{nm}}$  (—) and scintillation counting (■). Cytosine (0.65 eq.) was released (retention time 10.5 min) and 1.35 eq. of  $\text{F}_2\text{C}$  (retention time 30.5 min) was recovered.

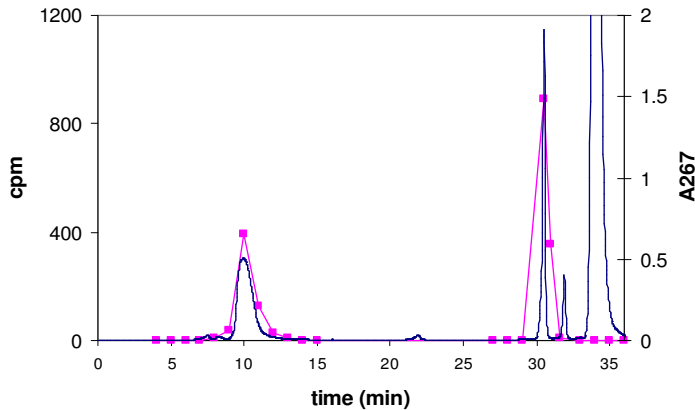

Figure S2. SDS-PAGE analysis of the  $\alpha/\beta$  (6  $\mu\text{M}$ ) inactivated by  $\text{F}_2\text{CDP}$  (30  $\mu\text{M}$ ) and ATP (3 mM) at 37 °C for 5 min. Each sample was mixed with 2x loading buffer  $\pm$   $\beta$ -ME or boiling for 2 min before loading as indicated. A band at 120 kDa is observed in Lanes 2, 3 (inactivation in the presence of DTT, without boiling) and Lanes 5, 6 (inactivation in the absence of DTT, without boiling).

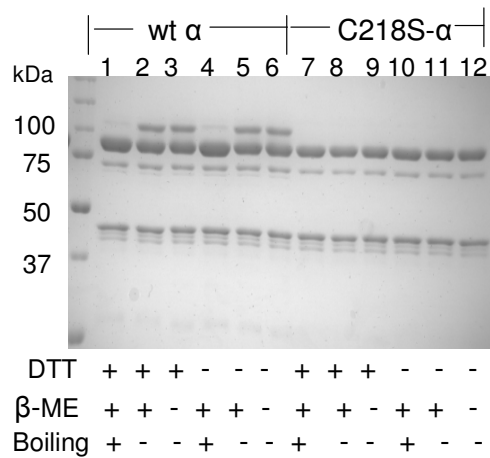

Figure S3. Gel filtration molecular weight standards (GE healthcare). Ovalbumin, 43 kDa; conalbumin, 75 kDa; aldolase, 158 kDa; catalase 232 kDa; ferritin, 440 kDa; and blue dextran, 2000 kDa ( $\blacklozenge$  from left to right).

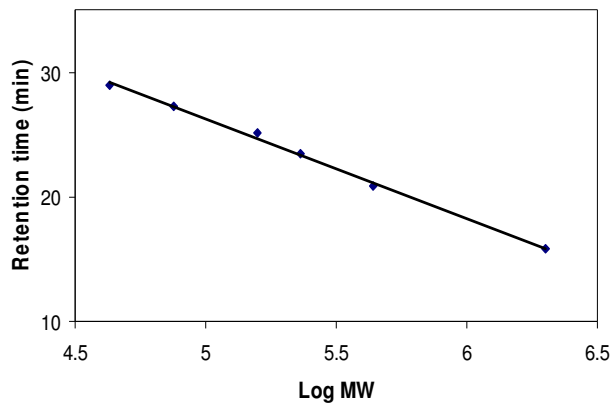

Figure S4. SEC of a control with  $\beta'2$ ,  $\alpha$  and  $\alpha2$  with TTP. (A)  $\beta'2$  (81 kDa) migrates at 26 min with an apparent MW 116 kDa. A S200 column (GE healthcare) was used. (B)  $\alpha$  (25 mM DTT). The first peak that elutes at 21.7 min is a contaminant that co-purifies with  $\alpha$ , the second protein elutes at 25.6 min, with apparent MW 88 kD. (C)  $\alpha2$  (100  $\mu$ M TTP). The protein peak that elutes at 22 min is the contaminant that co-purifies with  $\alpha$ . The second protein elutes at 24 min with an apparent MW 189 kD. Superose 12 column was used in (B) and (C).

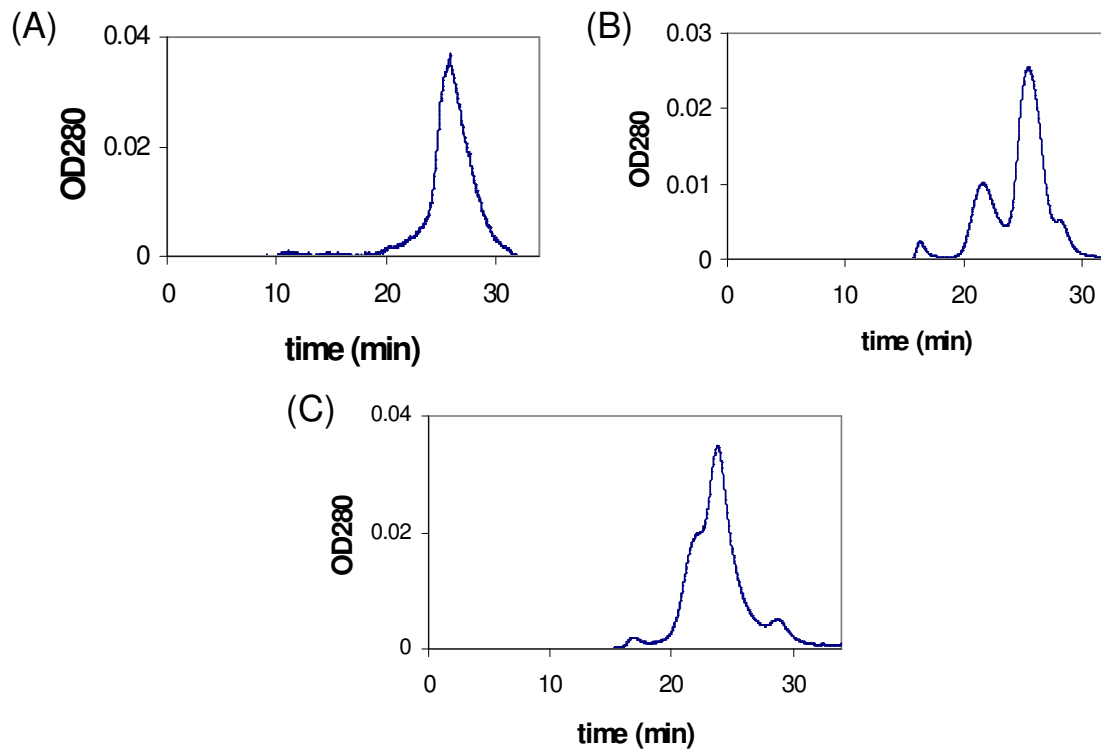

Figure S5. *E. coli*  $\alpha$  and  $\beta$  (0.05- 0.4  $\mu$ M) standards at different concentrations analyzed by SDS-PAGE to determine the ratio of  $\alpha$ ,  $\beta'$  in Figure 3B.

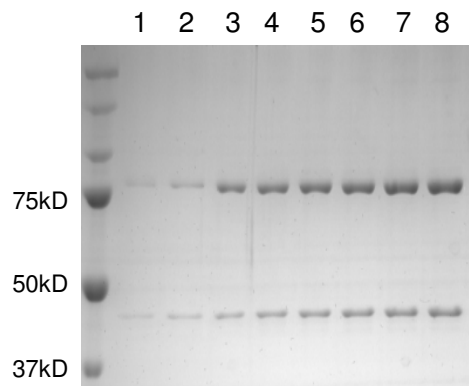

Supplement: NIHMS160707-supplement-1_si_001.pdf [file NIHMS160707-supplement-1_si_001.pdf]
